# Supplementary material
Source: PubMed Central journal article supplement (PMC3616632)
Supplement: NIHMS453072-supplement-SupplementalData.pdf [file NIHMS453072-supplement-SupplementalData.pdf]

|                                     |               |           |                |         |              |        |         |                  |             |                        |              |         |         |                                    |               |
|-------------------------------------|---------------|-----------|----------------|---------|--------------|--------|---------|------------------|-------------|------------------------|--------------|---------|---------|------------------------------------|---------------|
| Patient ID                          | 1-II:1        | 2-II:1    | 3-III:1        | 4-I:2   | 4-II:1       | 4-II:3 | 4-III:1 | 5-II:2           | 5-III:1     | 5-III:2                | 6-II:6       | 6-III:5 | 6-III:6 | 7-III:1                            | 8-II:3        |
| Mutation                            | del           | del       | p.R330C        | p.P366H |              |        |         | p.R327W          |             |                        | p.Y369Cfs*26 |         |         | p.A100_Y104 del                    | p.Y99*        |
| Sex                                 | M             | M         | F              | M       | M            | M      | M       | M                | F           | M                      | M            | M       | M       | F                                  | M             |
| Age                                 | 46            | 9         | 13             | 61      | 32           | 32     | 3       | 44               | 21          | 7                      | 43           | 10      | 7       | 28                                 | 50            |
| <b>Craniofacial</b>                 |               |           |                |         |              |        |         |                  |             |                        |              |         |         |                                    |               |
| Eye                                 | myopia        | hyperopia | lens opacities | myopia  | excav. papil | myopia | nl      | retinal detach   | nl          | nl                     | astigm       | nl      | nl      | nl                                 | myopia        |
| Downslant palpebral fissures        | -             | +         | +              | -       | +            | +      | -       | +                | +           | -                      | +            | +       | +       | +                                  | -             |
| Hypertelorism                       | +             | -         | +              | -       | -            | -      | -       | -                | -           | -                      | +            | +       | -       | +                                  | -             |
| High arched palate                  | +             | +         | +              | +       | +            | +      | +       | +                | +           | -                      | -            | +       | -       | -                                  | -             |
| Uvula                               | nl            | nl        | nl             | nl      | nl           | nl     | nl      | broad            | nl          | nl                     | nl           | nl      | nl      | broad                              | bifid         |
| Retrognathia                        | +             | +         | +              | +       | +            | +      | +       | +                | -           | +                      | +            | -       | -       | +                                  | -             |
| Other                               | torticollis   | ptosis    |                |         |              |        | ptosis  |                  |             | torticollis plagiocep. |              |         |         | spondylosis subluxation C7 over T1 |               |
| <b>Skeletal</b>                     |               |           |                |         |              |        |         |                  |             |                        |              |         |         |                                    |               |
| Stature (cm or percentile if child) | 193           | P95       | P9             | 171     | 200          | 196    | >P95    | 184              | 173         | P95                    | 196          | P95     | P95     | 177                                | 167           |
| Armspan ratio                       | 1.02          | 0.96      |                | 1.08    |              |        | 0.95    | 1.04             | 1.01        | 1.02                   |              |         |         | 1.03                               |               |
| Pectus Deformity                    | +             | +         | +              | +       | +            | +      | +       | -                | -           | -                      | -            | -       | +       | +                                  | -             |
| Scoliosis                           | +             | -         | -              | +       | +            | +      | -       | -                | -           | -                      | -            | -       | -       | -                                  | +             |
| Arachnodactyly                      | +             | +         | +              | +       | +            | +      | -       | +                | -           | -                      | -            | -       | -       | +                                  | -             |
| Club feet                           | +             | +         | +              | -       | -            | -      | -       | +                | -           | -                      | -            | -       | -       | +                                  | -             |
| Pes planus                          | -             | +         | -              | +       | +            | +      | +       | +                | +           | -                      | -            | -       | -       | +                                  | -             |
| Hypermobility (Beighton > 5/9)      | -             | -         | +              | +       | +            | +      | +       | -                | -           | -                      | -            | -       | -       | +                                  | +             |
| Other                               | Claw toes     | Claw toes |                |         |              |        |         | Knee dislocation |             |                        |              |         |         |                                    |               |
| <b>Cardiovascular</b>               |               |           |                |         |              |        |         |                  |             |                        |              |         |         |                                    |               |
| Aortic root Z-score                 | 2.8           | 3         | +              | 2       | 2.4          | 4.3    | 3       | 4*               | 3.7         | 6                      | 3.4          | 2.4     | 2.6     | 7*                                 | 8.4*          |
| Ao dissection/repair                | Type B age 42 |           |                |         |              |        |         | VSARR (45 mm)    |             |                        |              |         |         | VSARR (48 mm)                      | VSARR (56 mm) |
| Aortic valve                        | TAV           | TAV       | TAV            | TAV     | TAV          | TAV    | TAV     | AVR              | TAV         | TAV                    | TAV          | BAV     | BAV     | TAV                                | TAV           |
| Mitral valve                        | MVP           | -         | -              | MV-S    | MVP          | MVP    |         | MV-S             | MVP with MR | MR                     |              |         |         |                                    | -             |

|                       |                |                   |      |                |             |   |      |                       |      |      |                      |              |   |                |                    |
|-----------------------|----------------|-------------------|------|----------------|-------------|---|------|-----------------------|------|------|----------------------|--------------|---|----------------|--------------------|
| Other                 | VSD            |                   |      |                |             |   |      |                       |      |      | MPA                  |              |   | Tortuosity ASD | SVT                |
| <b>Skin</b>           |                |                   |      |                |             |   |      |                       |      |      |                      |              |   |                |                    |
| Striae                | -              | -                 | -    | -              | +           | + | -    | -                     | -    | -    | +                    | -            | - | -              | -                  |
| Hernia                | +              | -                 | +    | +              | +           | + | -    | +                     | +    | +    | +                    | -            | - | -              | +                  |
| Easy bruising         | -              | -                 | +    | -              |             |   | -    | +                     | +    | +    | +                    |              |   | -              | -                  |
| Other                 |                |                   | Thin | Varicose veins |             |   | Thin | Thin Dystrophic scars | soft | soft | soft                 | Keloid scars |   |                | Levold reticularis |
| <b>Dura</b>           | ND             | ND                | ND   | Tarlov cyst    | Tarlov cyst | - | ND   | ND                    |      |      | Tarlov cyst          |              |   | Dural ectasia  | -                  |
| <b>Other findings</b> | Cryptorchidism | Hypotonia, ataxia |      |                |             |   |      |                       |      |      | Supernumerary nipple |              |   |                |                    |

**Supplementary Table 1:** Abbreviations: VSARR: valve sparing aortic root replacement; BAV, bicuspid aortic valve; TAV, tricuspid aortic valve; MVP, mitral valve prolapse; MV-S: mitral valve surgery; ASD, atrial septal defect (surgically closed at time of VSARR); VSD, ventricular septal defect; MPA, main pulmonary artery aneurysm; SVT supraventricular tachycardia; ND not done; \* Z-score at time of surgery

Supplementary Table 2: TGFB2 primers and PCR conditions

| Name          | Forward                  | Reverse                  | Length | Protocol <sup>1</sup> |
|---------------|--------------------------|--------------------------|--------|-----------------------|
| TGFB2-Exon1   | AGGGTTCCTCTGCCCCGTCC     | CCGGGAGCTGCTGCGGTTTT     | 670    | 1                     |
| TGFB2-Exon2   | ATCCCCTGGCCCCAGGTAGC     | TCGCTCAGGTACAAGGCTGCAT   | 365    | 1                     |
| TGFB2-Exon3   | TTCCACCAGTCTGTCAGCCTCAA  | TCGGGTGTGATGGTGCACTCC    | 645    | 2                     |
| TGFB2-Exon4-5 | TTCATGGCAAATAGCCTGGTGTGT | TAGACCCTTCCCTCCCCACCT    | 596    | 1                     |
| TGFB2-Exon6   | AGCCCTGGCTTTGACACCGA     | TCTGGCCTTAGCAGTGAGTTCCAC | 534    | 2                     |
| TGFB2-Exon7   | TGGTTTGGGGTGAGGTGGTGG    | TGTGATGGTAAGACAGCACGAGGT | 344    | 2                     |
| TGFB2-Exon8   | TGCCTACTCAGTGCTGTGACTGCT | AGGCGCGGGATAGGAACGGT     | 666    | 2                     |

<sup>1</sup>: *Protocol 1*: 94°C 5min - [94°C 15s - 60°C 30s - 72°C 45s]x34 - 72°C 10min; *Protocol 2*: 94°C 3min - [94°C 30s - 67°C 30s (-0,5°C per cyclus) - 72°C 45s]x14 -

[94°C 30s - 60°C 30s - 72°C 45s]x20 - 72°C 10min

## Supplementary Figure 1

c.988 C>T; CGT>TGT  
p.Arg330Cys

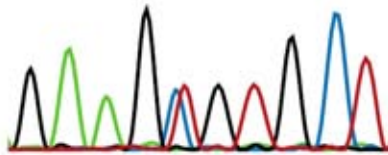

Family 3

c.1097 C>A; CCC>CAC  
p.Pro366His

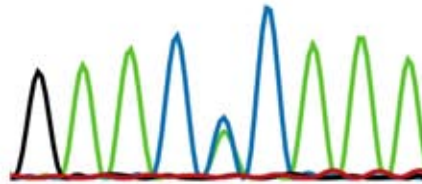

Family 4

c.979 C>T; CGG>TGG  
p.Arg327Trp

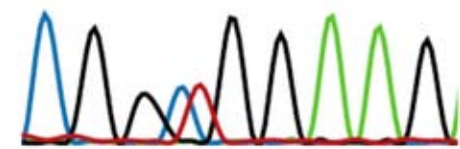

Family 5

c.1106\_1110delACAAT  
p.Tyr369Cysfs\*26

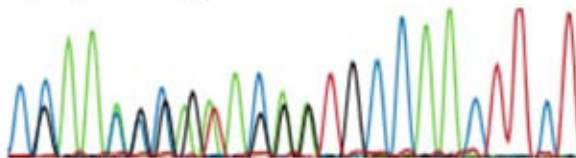

Family 6

c.294\_308 delCTACGCCAAGGAGGT  
p.Ala100\_Tyr104del

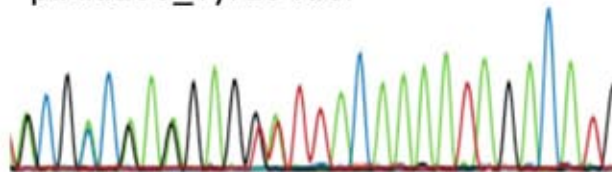

Family 7

c.297C>A; TAC>TAA  
p.Tyr99\*

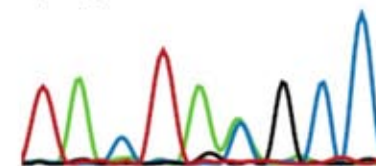

Family 8

Supplemental Figure 1 : Sequence chromatograms and corresponding interpretation of familial *TGFB2* mutations are displayed (Family 3 through Family 8).

# Supplementary Figure 2

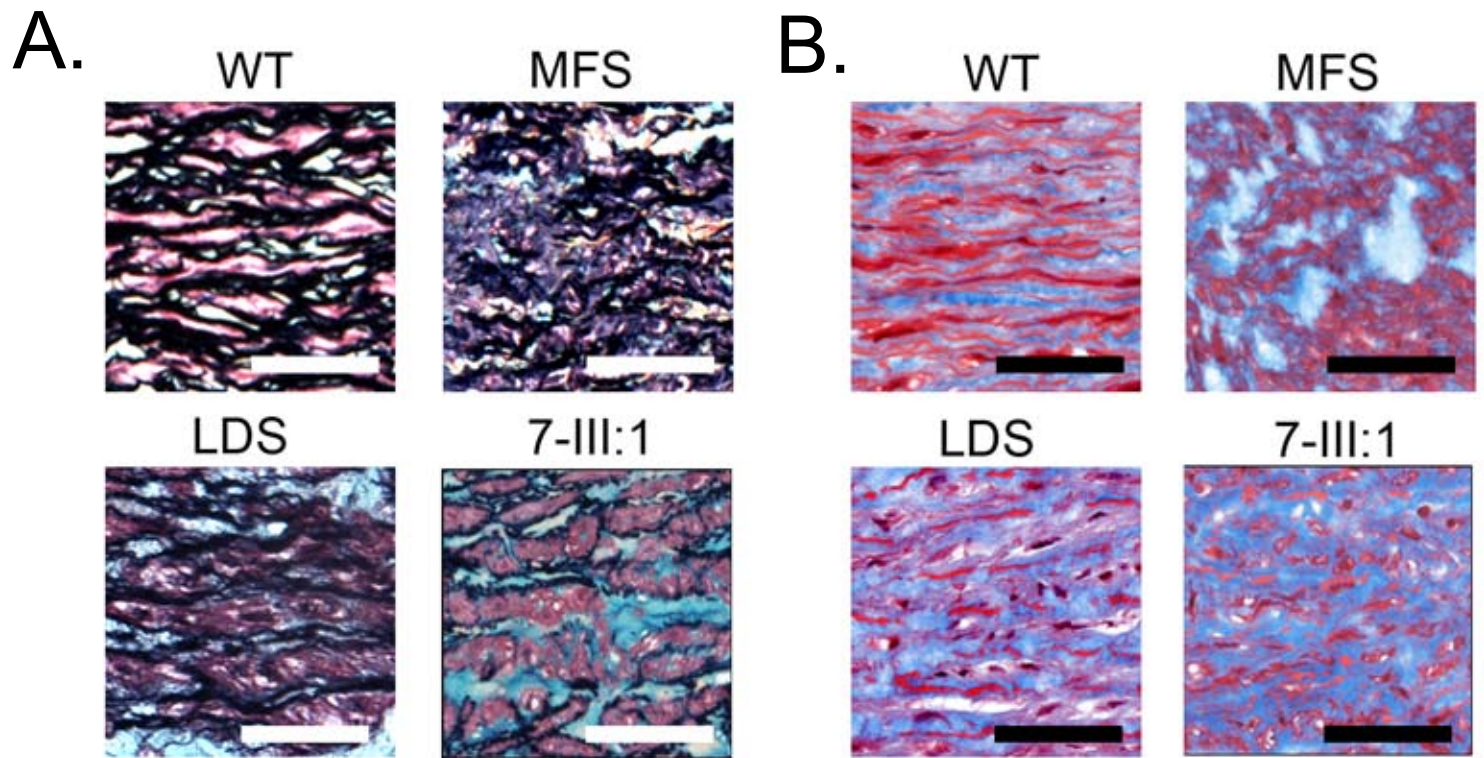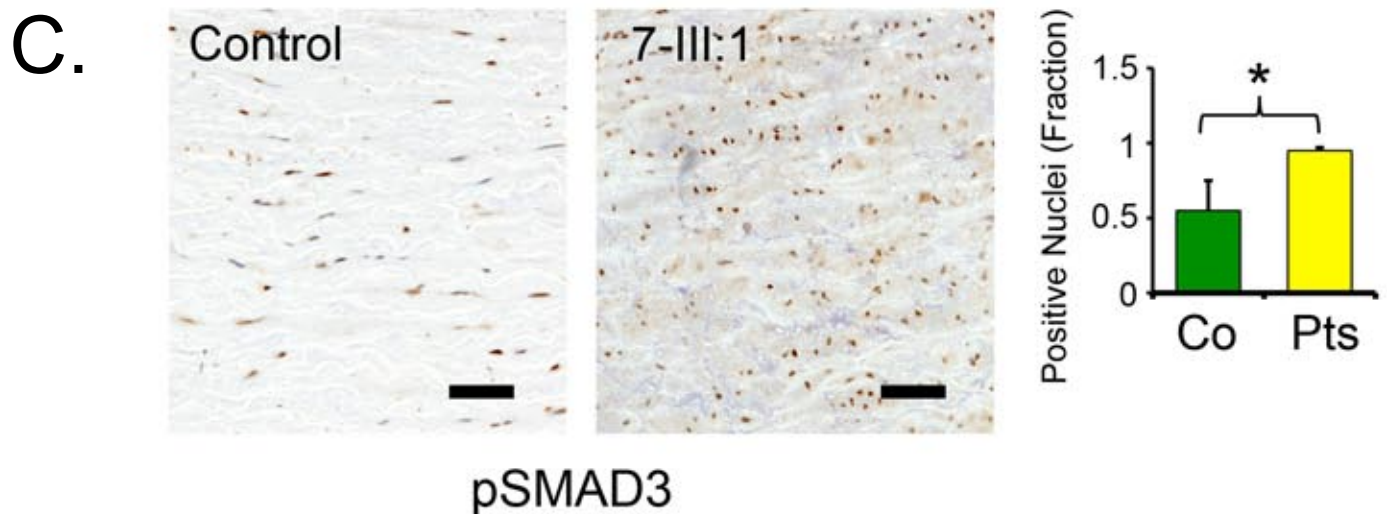

**Supplemental Figure 2 :** (A.) High magnification view of Movat's pentachrome staining of human aortic samples demonstrating an increase in proteoglycan deposition (Blue staining in Movat's pentachrome) and elastic fragmentation (Black in Movat's pentachrome) in MFS, LDS, and patient with *TGFB2* mutation (7:III-1) versus control, Bar= 80 $\mu$ M. (B.) High magnification view of Masson's Trichrome staining of human aortic samples with increased collagen deposition (Blue in Masson's Trichrome) in MFS, LDS, and patient with *TGFB2* mutation (7:III-1) versus control, Bar= 80 $\mu$ M. (C.) Quantification of fraction of pSMAD3 positive nuclei of control aortas (3) versus patients (7:III-1 and 5:II-2), (\* $p$ <0.05), Error bars equal 2 SEM, Bar= 80 $\mu$ M.

# Supplementary Figure 2

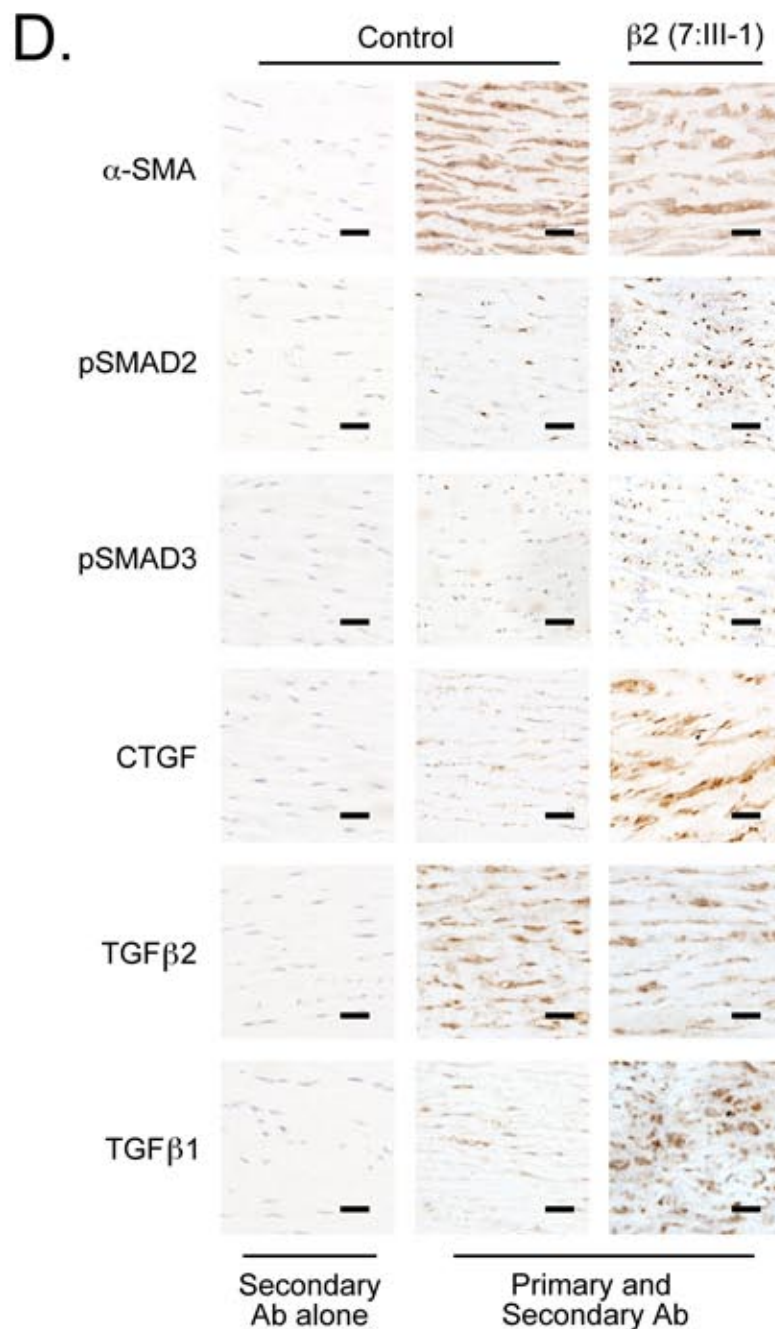

**Supplementary Figure 2:** (D.) Staining controls for human aortic IHC. Column 1 represents secondary antibody staining controls. Second and third columns represent staining with indicated primary and secondary antibodies of either control aorta (Column 2) or mutant aorta (Column 3). Bar= 80 $\mu$ M.

### Supplementary Figure 3

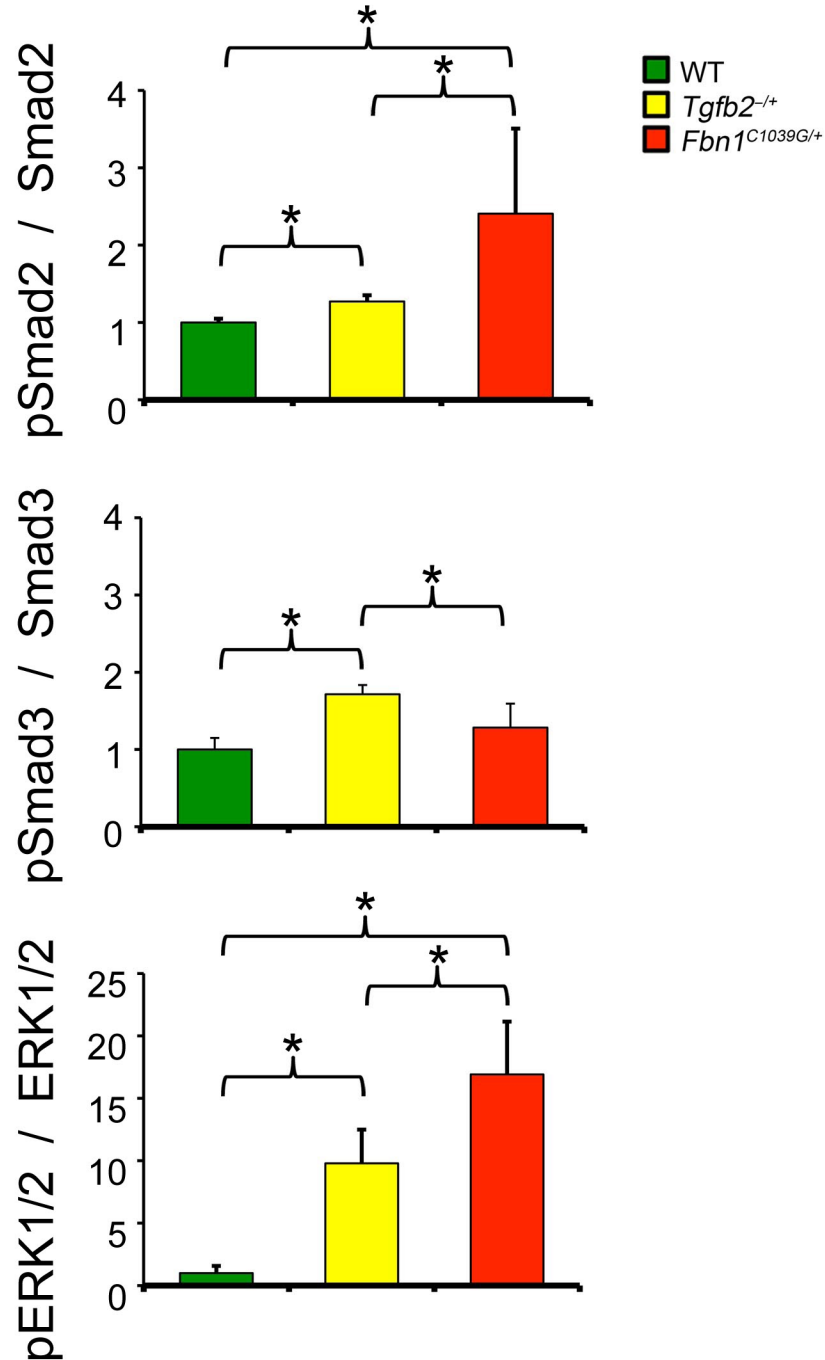

**Supplemental Figure 3:** Ratio of phosphorylated Smad2 western blot staining to total Smad2 and phosphorylated ERK1/2 western blot staining to total ERK1/2 western blot staining for 8 month old of WT, *Tgfb2*<sup>+/-</sup>, or *Fbn1*<sup>+/*C1039G*</sup> aortas, Error bars equal 2 SEM, (n=4 for each genotype), (\*p<0.05).

# Supplementary Figure 4

A.

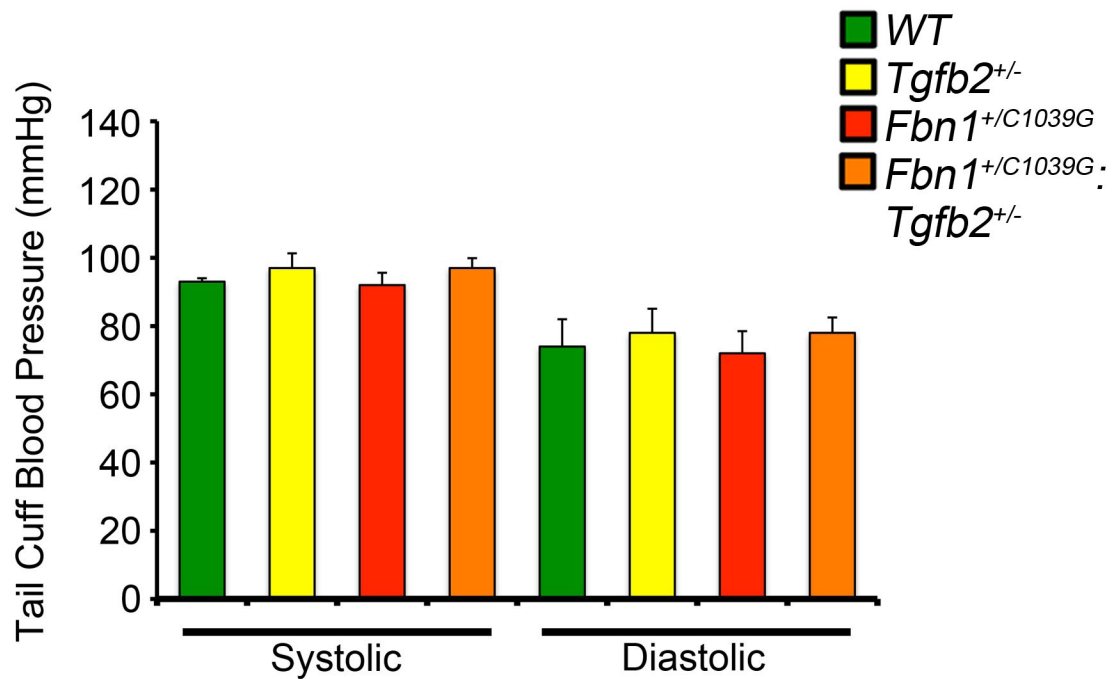

B.

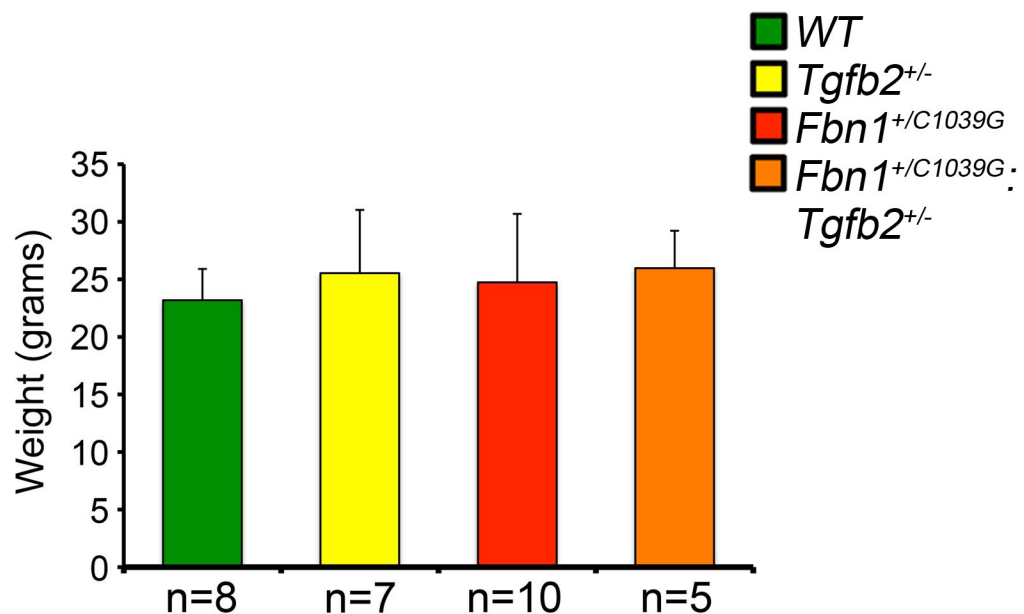

**Supplemental Figure 4:** Normal hemodynamic measurements and body size in *Tgfb2*<sup>+/-</sup>; *Fbn1*<sup>+/*C1039G*</sup> synthetic mice. (A.) Blood pressure quantification (systolic and diastolic) of WT, *Tgfb2*<sup>+/-</sup>, *Fbn1*<sup>+/*C1039G*</sup>, and *Tgfb2*<sup>+/-</sup>; *Fbn1*<sup>+/*C1039G*</sup> mice by tail cuff measurement. (B.) Weight of 4 month old WT, *Tgfb2*<sup>+/-</sup>, *Fbn1*<sup>+/*C1039G*</sup>, and *Tgfb2*<sup>+/-</sup>; *Fbn1*<sup>+/*C1039G*</sup> mice demonstrate no significant differences, Error bars equal 2 SEM.



## Supplementary Figure 5

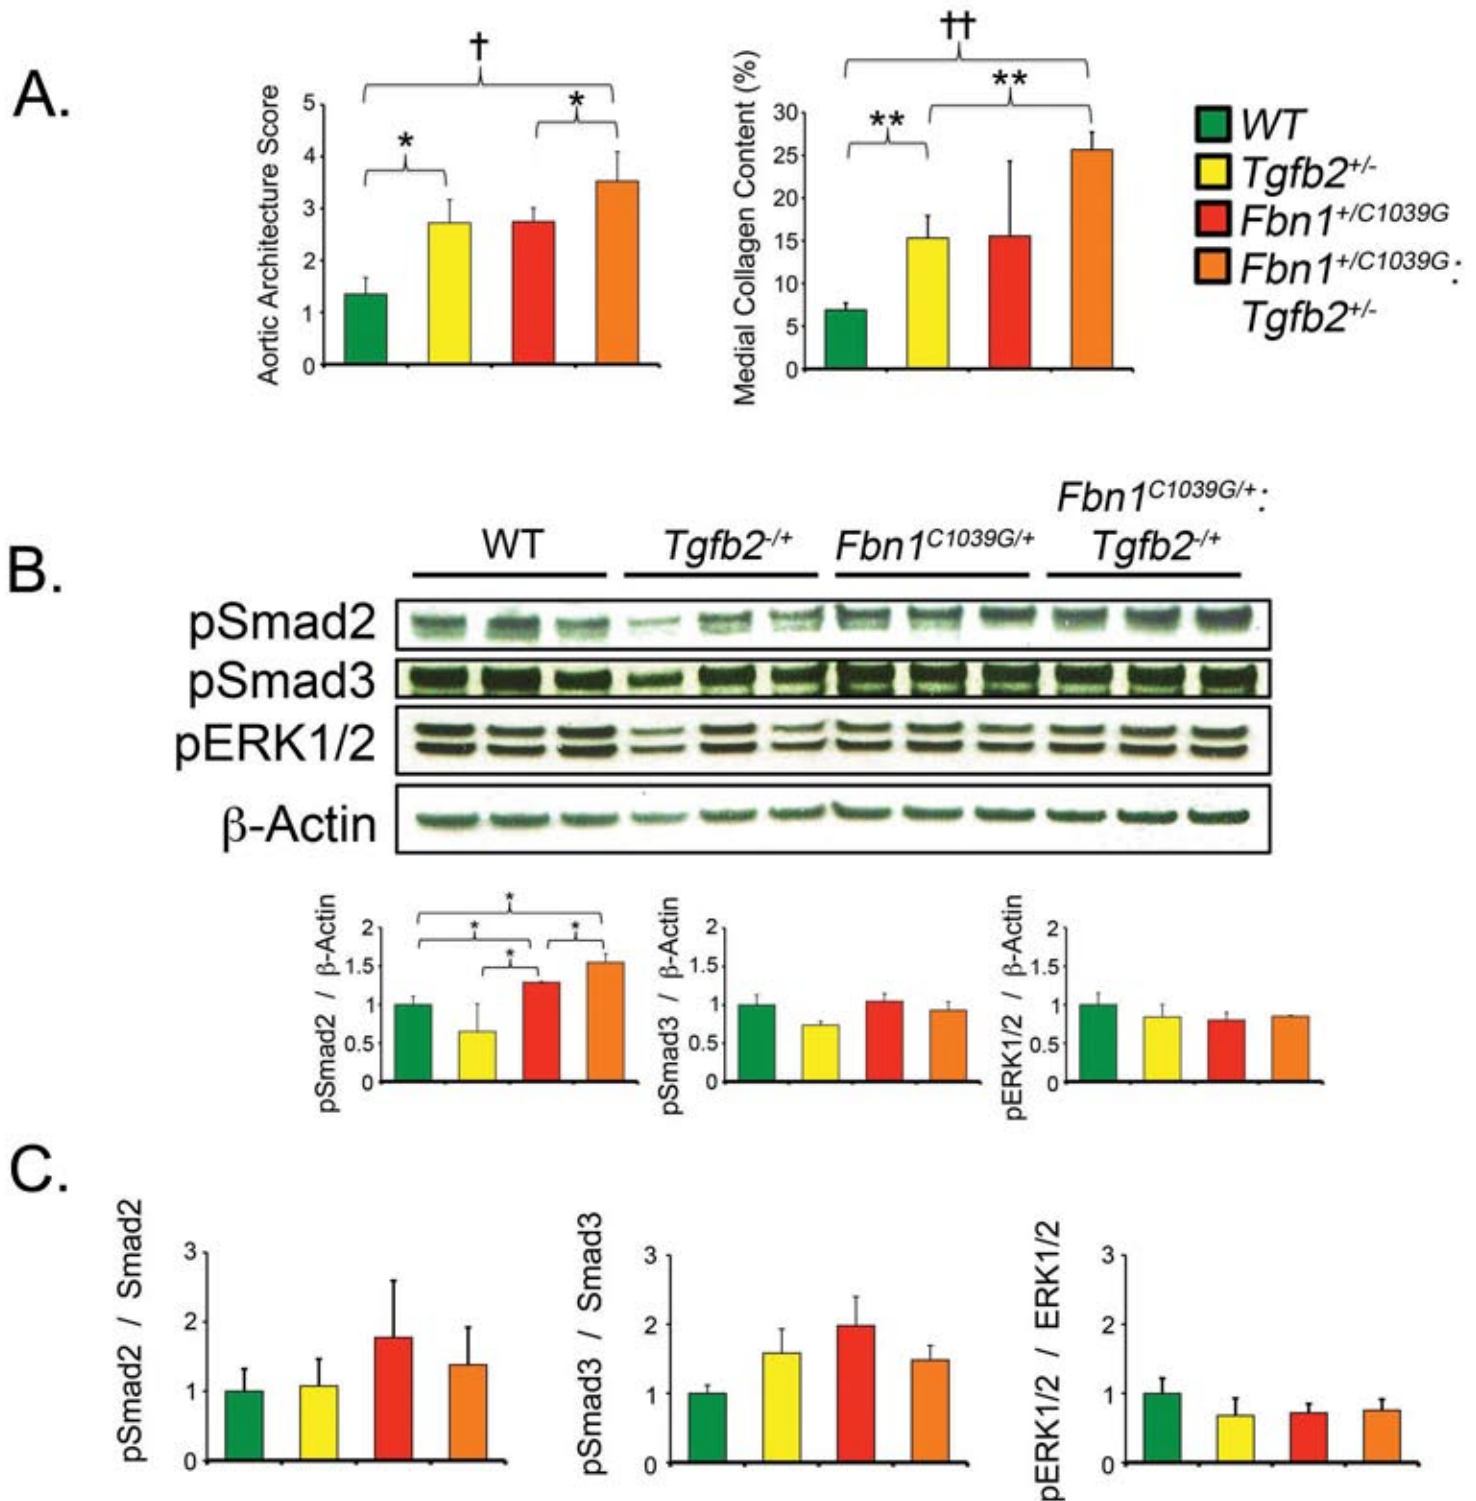

**Supplemental Figure 5:** (A.) Quantification of Aortic Histology in *Tgfb2*<sup>+/-</sup>; *Fbn1*<sup>+/*C1039G*</sup> synthetic mice. Graphs represent quantification of aortic architecture score and aortic collagen deposition, Error bars equal 2 SEM, (\*p<0.05, \*\*p<0.01, †p<0.005, ††p<0.001). (B.) Signaling within *Tgfb2*<sup>+/-</sup>; *Fbn1*<sup>+/*C1039G*</sup> aortas. Western blotting of aortas demonstrating increased phosphorylation of Smad2 in WT, *Tgfb2*<sup>+/-</sup>, *Fbn1*<sup>*C1039G*/+</sup>, and *Tgfb2*<sup>+/-</sup>; *Fbn1*<sup>+/*C1039G*</sup> mice. Quantification graphs of western blots (\*p<0.05) Error bars equal 2 SEM. (C.) Ratio of phosphorylated Smad2 western blot staining to total Smad2 and phosphorylated ERK1/2 western blot staining to total ERK1/2 western blot staining for 4 month old of WT, *Tgfb2*<sup>+/-</sup>, *Fbn1*<sup>+/*C1039G*</sup> and *Tgfb2*<sup>+/-</sup>; *Fbn1*<sup>+/*C1039G*</sup> murine aortas, (n=3 for each genotype), Error bars equal 2 SEM.

## Supplementary Figure 6

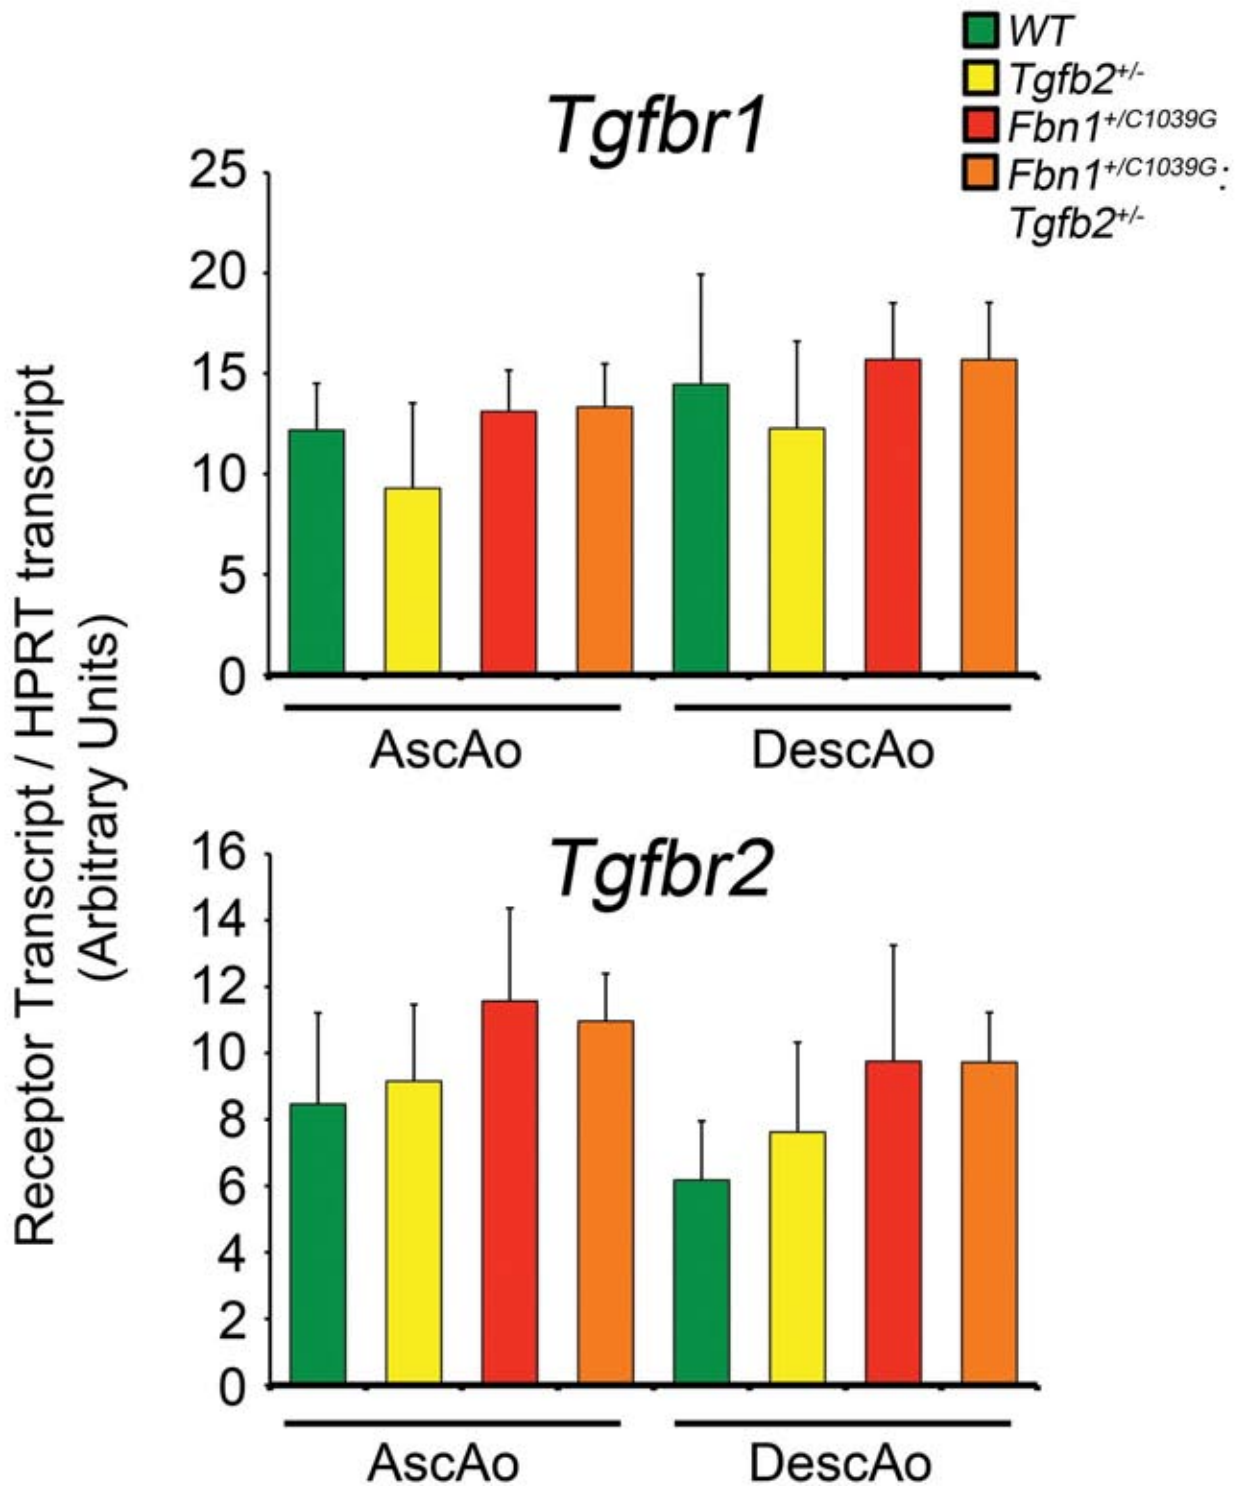

**Supplemental Figure 6:** Transcript analysis of *Tgfbr1* and *Tgfbr2* in ascending and descending aortas of 2 month old WT (n=3), *Tgfb2*<sup>+/-</sup> (n=3), *Fbn1*<sup>+/*C1039G*</sup> (n=3), and *Tgfb2*<sup>+/-</sup>; *Fbn1*<sup>+/*C1039G*</sup> (n=3) mice normalized to HPRT expression. There were no statistically significant differences, Error bars equal 2 SEM.

## Supplementary Figure 7

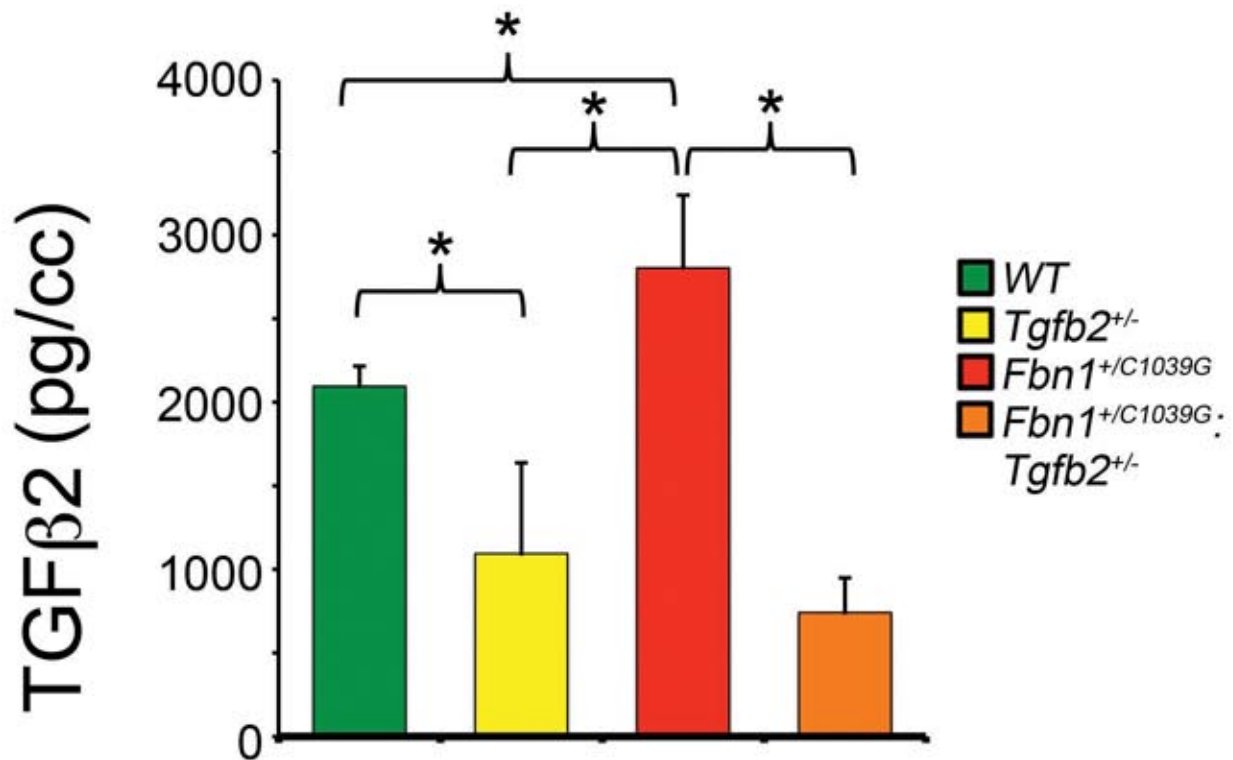

**Supplemental Figure 7:** Analysis of circulating TGFβ2 levels in mouse plasma from 4 month old WT (n=4), Tgfb2<sup>+/-</sup> (n=4), Fbn1<sup>+/-</sup>C1039G (n=4), and Tgfb2<sup>+/-</sup>; Fbn1<sup>+/-</sup>C1039G (n=4) animals. Ligand levels are expressed in units of picogram per milliliter. (\*p<0.05). Error bars equal 2 SEM.
